# Supplementary material for: Stimulation better targets fast ripple generating networks in super-responders to the responsive neurostimulator system (RNS)
Source: medRxiv preprint, doi:10.1101/2022.11.30.22282937, version 1 (2022-12-06)
Supplement: supplementary methods [file 282937_file02.docx]

Supplemental Materials

Stimulation better targets fast ripple generating networks in super-responders to the responsive neurostimulator system (RNS).

Shennan Aibel Weiss1,2,3, Daniel Rubinstein9, John Stern4, Dawn Eliashiv4, Itzhak Fried5, Chengyuan Wu10,11, Ashwini Sharan11, Jerome Engel4-8, Richard Staba4, Michael R. Sperling9

1. Dept. of Neurology, State University of New York Downstate, Brooklyn, New York 11203, USA
2. Dept. of Physiology and Pharmacology, State University of New York Downstate, Brooklyn, New York 11203, USA
3. Dept. of Neurology, New York City Health + Hospitals/Kings County, Brooklyn, NY, USA
4. Dept. of Neurology, David Geffen School of Medicine at UCLA, Los Angeles, California 90095, USA
5. Dept. of Neurosurgery, David Geffen School of Medicine at UCLA, Los Angeles, California 90095, USA
6. Dept. of Neurobiology, David Geffen School of Medicine at UCLA, Los Angeles, California 90095, USA
7. Dept. of Psychiatry and Biobehavioral Sciences, David Geffen School of Medicine at UCLA, Los Angeles, California 90095, USA
8. Brain Research Institute, David Geffen School of Medicine at UCLA, Los Angeles, California 90095, USA
9. Depts. of Neurology and Neuroscience, Thomas Jefferson University, Philadelphia, PA 19107, USA
10. Dept. of Neuroradiology, Thomas Jefferson University, Philadelphia, PA, 19107, USA
11. Dept. of Neurosurgery, Thomas Jefferson University, Philadelphia, PA 19107, USA

Supplemental Methods

iEEG recordings: For each patient, clinical iEEG (0.1–600 Hz; 2000 samples per second) was recorded from 8 to 16 depth electrodes, each with 7–15 contacts, using a Nihon-Kohden 256-channel JE-120 long-term monitoring system (Nihon-Kohden America, Foothill Ranch, CA, USA). A larger number of electrodes with more contacts were implanted at TJU. The reference signal used for the recordings performed at UCLA was a scalp electrode position at Fz in the International 10–20 System. The reference signal used for the TJU recordings was an electrode in the white matter that was: 1) estimated far from the cortical layers based on the electrode design and trajectory; 2) far from the putative SOZ based on scalp recordings; and 3) exhibited low voltages relative to the other contacts on the electrode.

Neuroimaging and derivation of stimulated contacts: A custom pipeline (<https://github.com/pennmem/neurorad_pipeline>) was used to derive the normalized MNI coordinates of the SEEG contacts and the RNS contacts1–3. Voxtool (https://github.com/pennmem/voxTool) was used on the post-SEEG implant CT and post-RNS placement CT to label the SEEG contacts and RNS stimulation contact, respectively. FreeSurfer (http://surfer.nmr.mgh.harvard.edu/) was used on the MRI to construct individual subject brain surfaces and cortical parcellations according to the Desikan–Killiany atlas4. The Advanced Neuroimaging Tools5 was used to separately coregister: 1) the post-SEEG implant CT with the MRI; and 2) the post-RNS placement CT with the MRI and the position of each electrode contact was localized to the Desikan-Killiany atlas. The pipeline was then used to transform the position of each electrode contact from individual subject space to an averaged FreeSurfer space with normalized Montreal Neurological Institute (MNI) coordinates (defined by the fsaverage brain).

To determine the stimulated SEEG contacts the Euclidian distance calculated as was derived between all the RNS and SEEG electrodes. SEEG with a single Euclidian distance value for a RNS and SEEG pair less than or equal to 15 mm in Normalized MNI coordinates were designated stimulated electrodes. The threshold of 15 mm was selected according to the equation which derives the electric field strength produced by a monopolar current source, where V is voltage, I is current, r is the distance from the monopolar source, and σ is the conductivity of gray matter6,7.

HFO detection

In brief, the HFO detector reduced muscle and electrode artifacts in the iEEG recordings using an independent component analysis (ICA)-based algorithm8. After applying this ICA-based method, ripples and fast ripples were detected in the referential and bipolar montage iEEG recordings per contact by utilizing a Hilbert detector, in which a 1,000th order symmetric finite impulse response (FIR) band-pass filter in the 200-600 Hz band for fast ripples was applied, and (ii) a Hilbert transform was applied to calculate the instantaneous amplitude of this time series according to the analytic signal z(t) in Eqn. 1.

z(t)=a(t) e^(iθ(t))

where a(t) is the instantaneous amplitude and θ(t) is the instantaneous phase of z(t). Following the Hilbert transform, the instantaneous HFO amplitude function [a(t)] was smoothed using moving window averaging, the smoothed instantaneous HFO amplitude function was normalized using the mean and standard deviation of the time series, and a statistical threshold defined by the skewness of the normalized band pass filtered time series was used to detect the onset and offset of discrete/potential events9–13.

Selection of a referential or bipolar montage for individual channels or channel pairs, within patients, was based on either visual inspection or automatically selected by the detector. In the former case, patients recorded with Nihon Kohden only have grounding to the first 64 channels and thobe beginning 65 and higher are not, and thus a bipolar montage best reduces noise.In the latter case, machine learning based on several statistical features of the signal were used to automatically transition referential channels to bipolar pairs.

HFO-like events can arise due to Gibb’s phenomenon, i.e., high-pass filtering sharp transients, including epileptiform spikes14. To distinguish authentic HFOs from authentic HFOs on EEG spikes or spurious HFO due to filter ringing, we used an algorithm that performed topographic analysis of time-frequency plots for each HFO and defined open- and closed-loop contour groups9,15. The algorithm also measured the power, spectral content, duration, onset time, and offset time of each HFO and categorized the HFO as an HFO on oscillation, HFO on spike, or sharp-spike (i.e. false HFO). HFOs that did not coincide with spikes were defined as closed-loop contour groups with an onset that did not overlap with the onset of open-loop contour groups. For HFOs on spikes the two groups temporally overlapped3,45. Following automatic detection of HFO and sharp-spikes, false detections of clear muscle and mechanical artifact were deleted by visual review in Micromed Brainquick (Venice, Italy). The complete open-source HFO detector can be downloaded at <https://github.com/shenweiss>.

Derivation of fast ripple stimulated global efficiency

The fast ripple stimulated global efficiency (FR SGe) was calculated using the Brain Connectivity Toolbox (https://sites.google.com/site/bctnet/)16 function charpath.m. The adjacency matrix for the mutual information (MI) networks were calculated using FR event ‘spike trains’ defined by the onset times of each event and then calculating MI between electrode contacts (*i.e.,* nodes) with the adaptive partition using inter-spike intervals MI estimator17. To calculate the distance the inverse of the adjacency matrix was derived. To calculate the FR SGe, edges between non-stimulated nodes (i.e. non-stimulated node:non-stimulated node) were assigned an infinite distance.

Data visualization

Example weighted node distributions and examples of FR MI networks were rendered with Brainnet viewer18.

1. Horak PC, Meisenhelter S, Song Y, Testorf ME, Kahana MJ, Viles WD, et al. Interictal epileptiform discharges impair word recall in multiple brain areas. Epilepsia. 2017; 58(3):373–80.

2. Kucewicz MT, Berry BM, Miller LR, Khadjevand F, Ezzyat Y, Stein JM, et al. Evidence for verbal memory enhancement with electrical brain stimulation in the lateral temporal cortex. Brain. 2018; 141(4):971–8.

3. Rubinstein DY, Camarillo-Rodriguez L, Serruya MD, Herweg NA, Waldman ZJ, Wanda PA, et al. Contribution of left supramarginal and angular gyri to episodic memory encoding: An intracranial EEG study. Neuroimage. 2021; 225:117514.

4. Desikan RS, Ségonne F, Fischl B, Quinn BT, Dickerson BC, Blacker D, et al. An automated labeling system for subdividing the human cerebral cortex on MRI scans into gyral based regions of interest. Neuroimage. 2006; 31(3):968–80.

5. Avants BB, Epstein CL, Grossman M, Gee JC. Symmetric diffeomorphic image registration with cross-correlation: Evaluating automated labeling of elderly and neurodegenerative brain. Med Image Anal. 2008; 12(1):26–41.

6. Koessler L, Colnat‐Coulbois S, Cecchin T, Hofmanis J, Dmochowski JP, Norcia AM, et al. In‐vivo measurements of human brain tissue conductivity using focal electrical current injection through intracerebral multicontact electrodes. Hum Brain Mapp. 2016; 38(2):974–86.

7. Plonsey R, Barr RC. Bioelectricity A Quantitative Approach. Kluwer Academic/Plenum Publishers; 2000.

8. Shimamoto S, Waldman ZJ, Orosz I, Song I, Bragin A, Fried I, et al. Utilization of independent component analysis for accurate pathological ripple detection in intracranial EEG recordings recorded extra- and intra-operatively. Clin Neurophysiol. 2018; 129(1):296–307.

9. Weiss SA, Berry B, Chervoneva I, Waldman Z, Guba J, Bower M, et al. Visually validated semi-automatic high-frequency oscillation detection aides the delineation of epileptogenic regions during intra-operative electrocorticography. Clin Neurophysiol. 2018; 129(10):2089–98.

10. Weiss SA, Song I, Leng M, Pastore T, Slezak D, Waldman Z, et al. Ripples Have Distinct Spectral Properties and Phase-Amplitude Coupling With Slow Waves, but Indistinct Unit Firing, in Human Epileptogenic Hippocampus. Front Neurol. 2020; 11:174.

11. Weiss SA, Pastore T, Orosz I, Rubinstein D, Gorniak R, Waldman Z, et al. Graph theoretical measures of fast ripples support the epileptic network hypothesis. Brain Commun. 2022; .

12. Weiss S, Sheybani L, Seenarine N, Fried I, Sharan A, Wu C, et al. Delta Oscillation Coupled Propagating Fast Ripples Precede Epileptiform Discharges in Patients with Focal Epilepsy. Preprint: Research Square: <https://doi.org/1021203/rs3.rs-1640013/v2.> 2022; .

13. Weiss SA, Fried I, Wu C, Sharan A, Rubinstein D, Sperling M, et al. Graph theoretical measures of fast ripple networks improve the accuracy of post-operative seizure outcome prediction. Preprint: Research Square: <https://doi.org/1021203/rs3.rs-2050527/v1.> 2022; .

14. Bénar CG, Chauvière L, Bartolomei F, Wendling F. Pitfalls of high-pass filtering for detecting epileptic oscillations: A technical note on “false” ripples. Clin Neurophysiol. 2010; 121(3):301–10.

15. Waldman ZJ, Shimamoto S, Song I, Orosz I, Bragin A, Fried I, et al. A method for the topographical identification and quantification of high frequency oscillations in intracranial electroencephalography recordings. Clin Neurophysiol. 2018; 129(1):308–18.

16. Rubinov M, Sporns O. Complex network measures of brain connectivity: Uses and interpretations. Neuroimage. 2010; 52(3):1059–69.

17. Gribkova ED, Ibrahim BA, Llano DA. A novel mutual information estimator to measure spike train correlations in a model thalamocortical network. J Neurophysiol. 2018; 120(6):2730–44.

18. Xia M, Wang J, He Y. BrainNet Viewer: A Network Visualization Tool for Human Brain Connectomics. Plos One. 2013; 8(7):e68910.
